# Supplementary material for: Reaction with ROO• and HOO• Radicals of Honokiol-Related Neolignan Antioxidants
Source: MDPI journal article supplement (doi:10.3390/molecules28020735), 2023-01-11
Supplement: s1 [file s1]

# SUPPORTING INFORMATION

## Reaction with ROO• and HOO• Radicals of Honokiol-Related Neolignan Antioxidants

Nunzio Cardullo <sup>1</sup>, Filippo Monti <sup>2</sup>, Vera Muccilli <sup>1</sup>, Riccardo Amorati <sup>3,\*</sup> and Andrea Baschieri <sup>2,\*</sup>

<sup>1</sup> Dipartimento di Scienze Chimiche, Università di Catania, V.le A. Doria 6, 95125 Catania, Italy

<sup>2</sup> Istituto per la Sintesi Organica e la Fotoreattività (ISOF), Consiglio Nazionale delle Ricerche (CNR) Via Gobetti 101, 40129 Bologna, Italy

<sup>3</sup> Dipartimento di Chimica "G. Ciamician", Università di Bologna, Via S. Giacomo 11, 40126 Bologna, Italy

\* Correspondence: [riccardo.amorati@unibo.it](mailto:riccardo.amorati@unibo.it) (R.A.); [andrea.baschieri@isof.cnr.it](mailto:andrea.baschieri@isof.cnr.it) (A.B.)

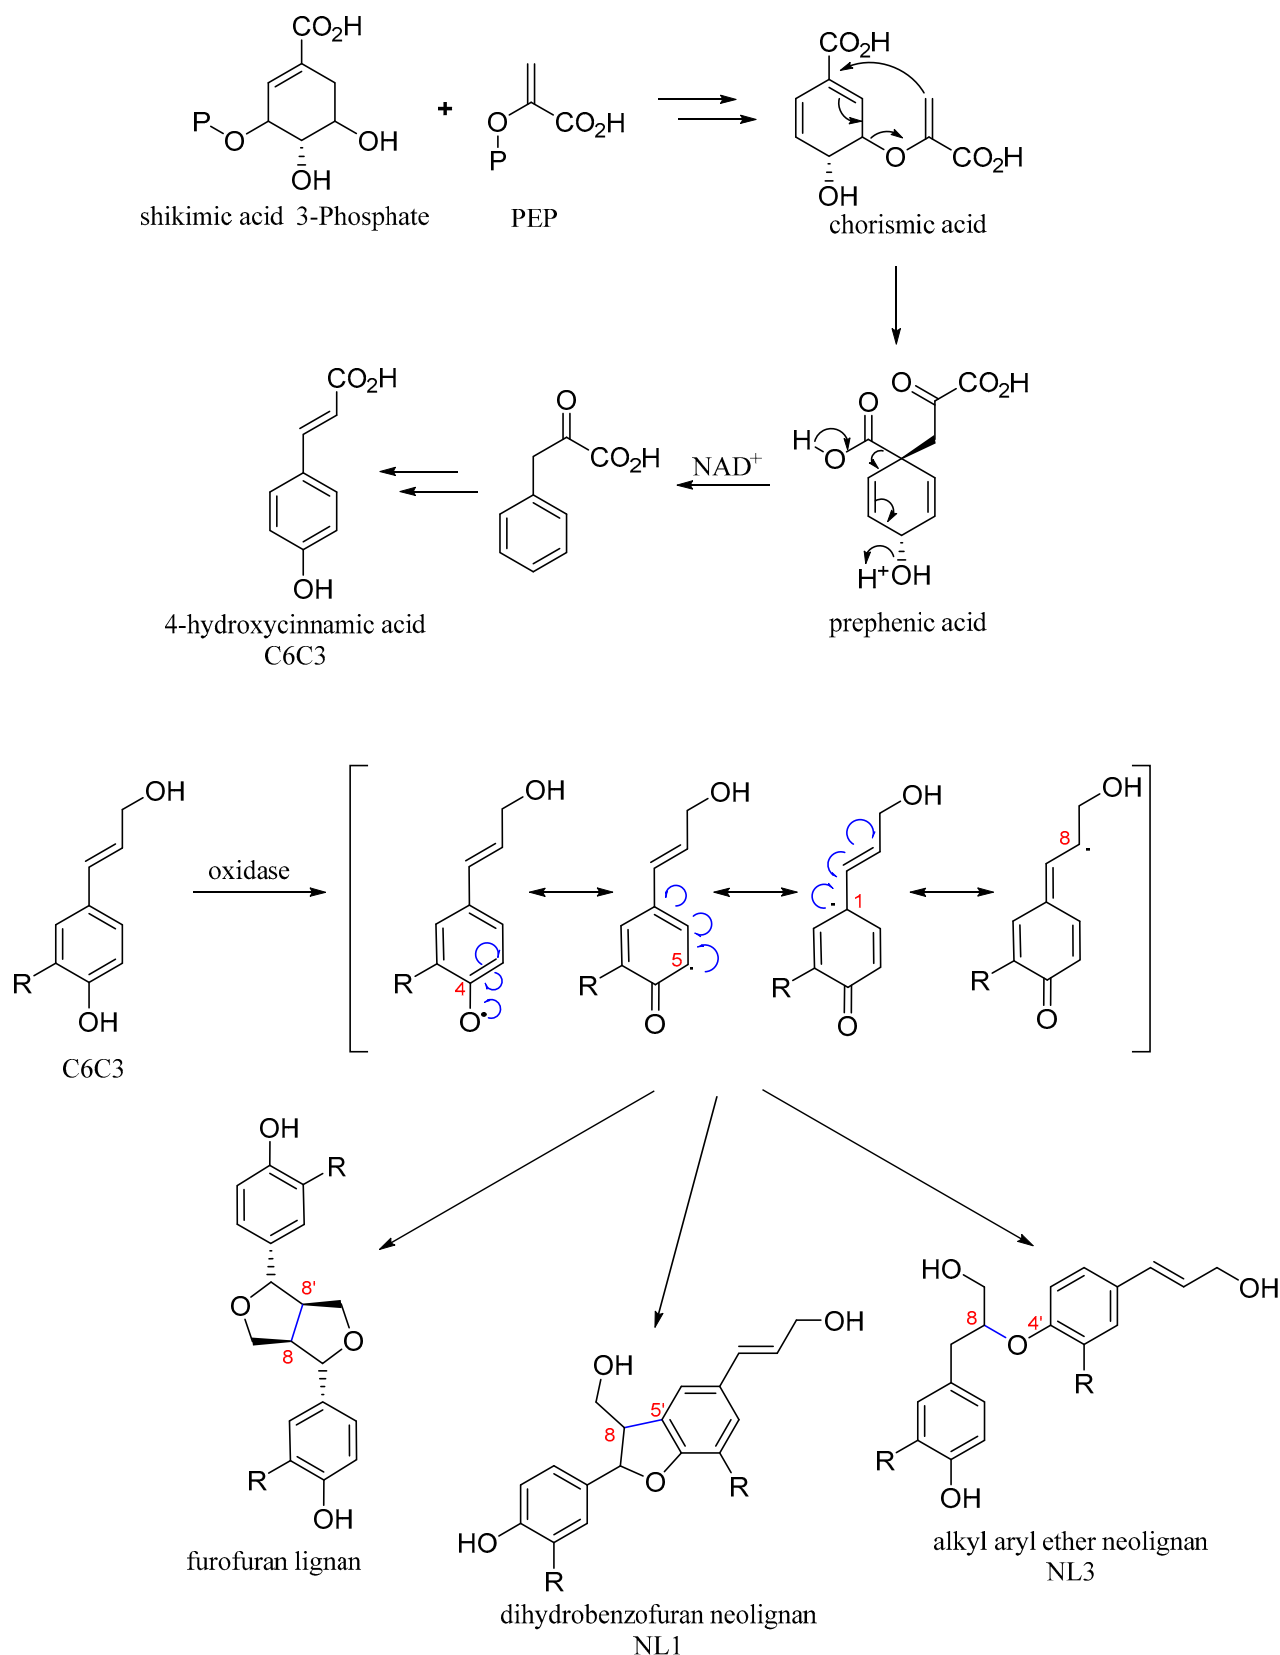

**Figure S1.** Schematization of biosynthetic pathway for the synthesis of phenylpropanoids C6C3, lignans and neolignans [56]. NL1 and NL3 are referred to neolignans according to the classifications of Teponno et al. [4].

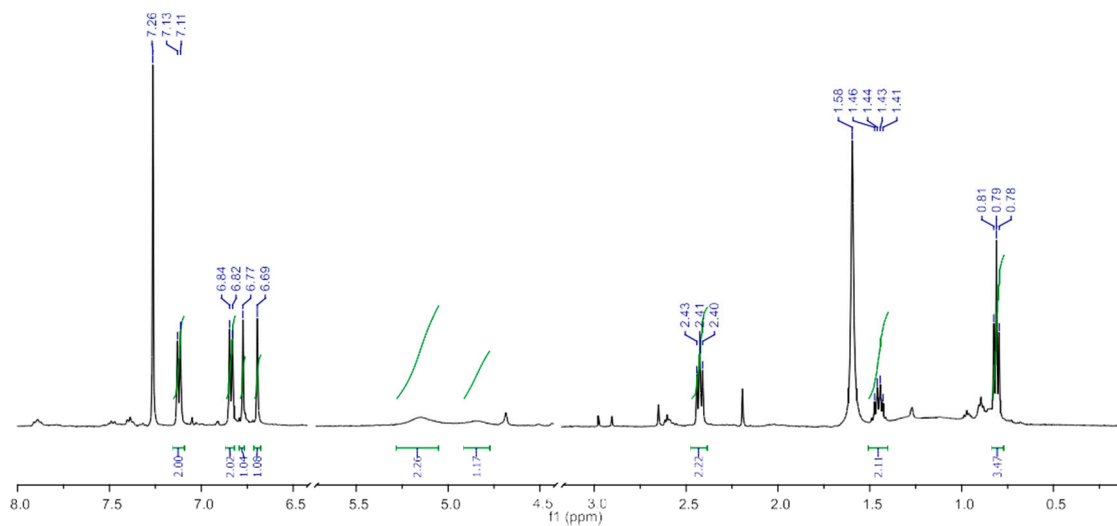

**Figure S2.** <sup>1</sup>H NMR spectrum (500 MHz, CDCl<sub>3</sub>) of 7.

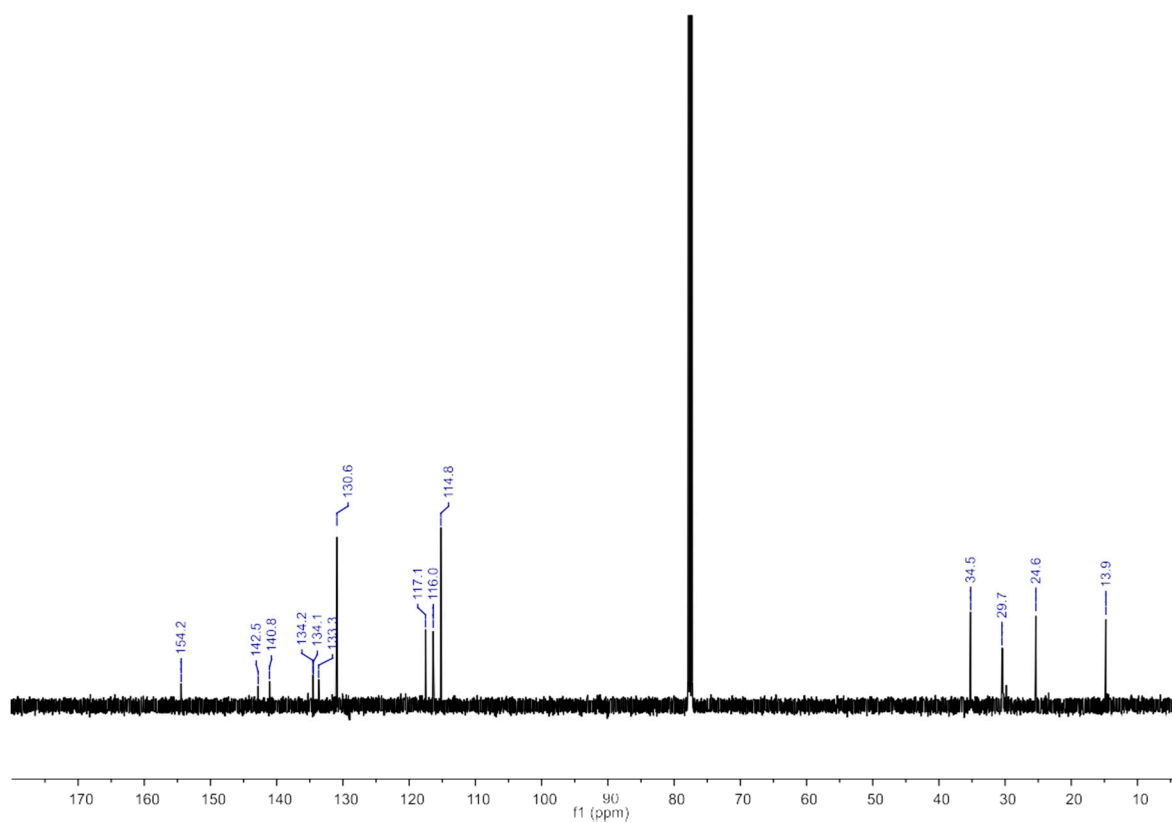

**Figure S3.** <sup>13</sup>C NMR spectrum (500 MHz, CDCl<sub>3</sub>) of 7.

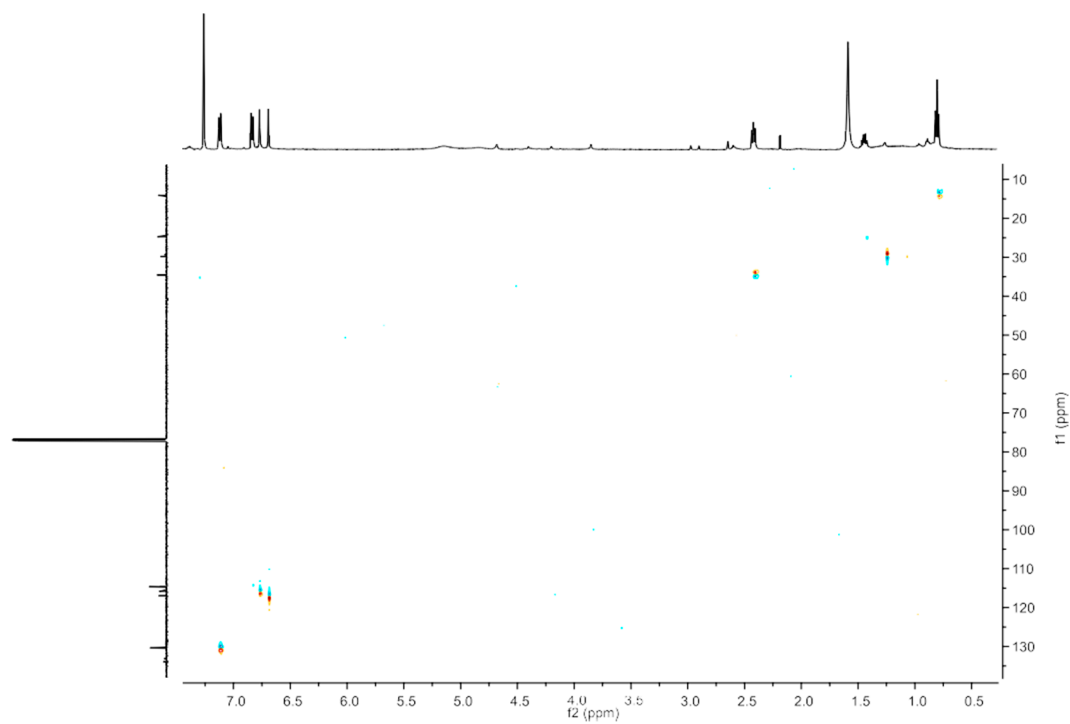

**Figure S4.** gHSQC spectrum of 7.

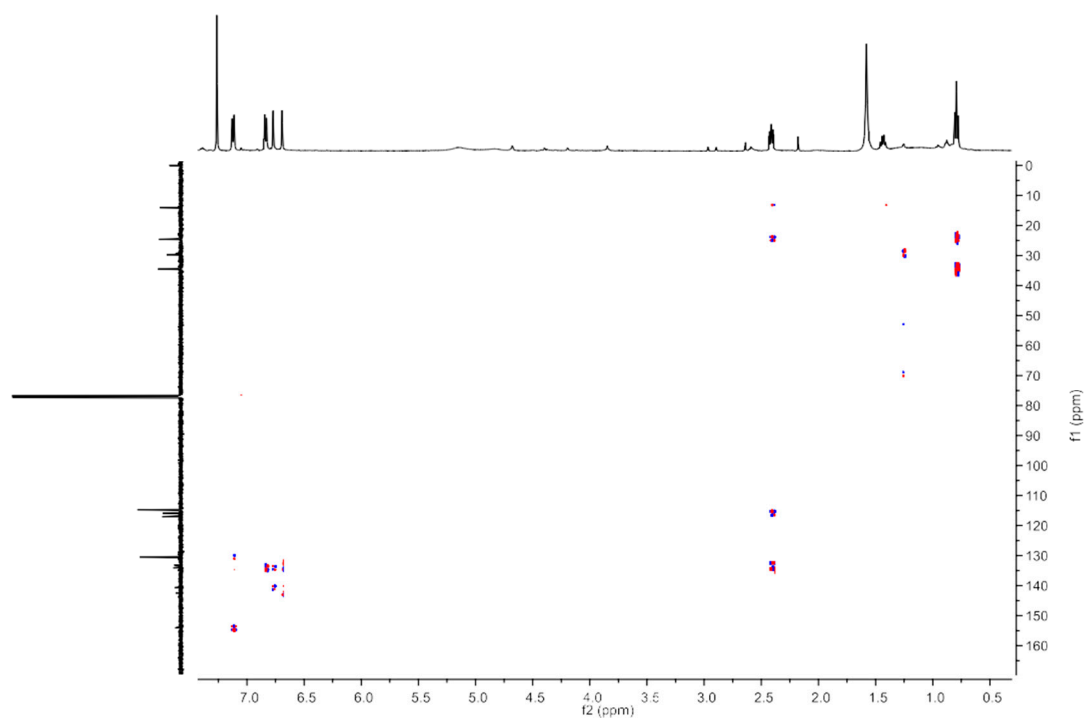

**Figure S5.** gHMBC spectrum of 7.

## References

4. Teponno, R.B.; Kusari, S.; Spiteller, M. Recent advances in research on lignans and neolignans. *Nat. Prod. Rep.* **2016**, *33*, 1044–1092.
56. Dewick, P.M. The shikimate pathway: aromatic amino acids and phenylpropanoids. In *Medicinal Natural Products: A Biosynthetic Approach*; 3rd ed.; John Wiley & Sons Ltd: Hoboken, NJ, USA, 2009; pp.137–186. <https://doi.org/10.1002/9780470742761.ch4>
